# Supplementary material for: Anti-Inflammatory State in Arabian Horses Introduced to the Endurance Training
Source: PubMed Central journal article supplement (PMC6769738; doi:10.3390/ani9090616), 2019-08-27
Supplement: animals-09-00616-s001.pdf [file animals-09-00616-s001.pdf]

**Table S1** Cytokines whose concentration was not significantly affected by repeated training in the mixed linear model

| Variable                                     | IL-2                               |                      |         | IL-4                               |                      |         | IL-10                              |                      |         | INF $\gamma$                       |                      |         |
|----------------------------------------------|------------------------------------|----------------------|---------|------------------------------------|----------------------|---------|------------------------------------|----------------------|---------|------------------------------------|----------------------|---------|
|                                              | Estimate of the model <sup>a</sup> | Parameter statistics | p-value | Estimate of the model <sup>a</sup> | Parameter statistics | p-value | Estimate of the model <sup>a</sup> | Parameter statistics | p-value | Estimate of the model <sup>a</sup> | Parameter statistics | p-value |
| Intercept                                    | 26.30 $\pm$ 2.49                   | -                    | -       | 37.05 $\pm$ 2.93                   | -                    | -       | 237.9 $\pm$ 18.49                  | -                    | -       | 41.58 $\pm$ 2.97                   | -                    | -       |
| Variables fitted as fixed effects            |                                    |                      |         |                                    |                      |         |                                    |                      |         |                                    |                      |         |
| Time of blood collection before <sup>b</sup> | 0                                  | -                    | -       | 0                                  | -                    | -       | 0                                  | -                    | -       | 0                                  | -                    | -       |
| after                                        | -1.41 $\pm$ 1.48                   | -0.95                | 0.346   | -0.84 $\pm$ 1.46                   | -0.58                | 0.567   | -12.92 $\pm$ 7.37                  | -1.75                | 0.086   | -2.14 $\pm$ 1.37                   | -1.56                | 0.126   |
| Training:                                    |                                    |                      |         |                                    |                      |         |                                    |                      |         |                                    |                      |         |
| 1st <sup>b</sup>                             | 0                                  | -                    | -       | 0                                  | -                    | -       | 0                                  | -                    | -       | 0                                  | -                    | -       |
| 2nd                                          | -1.52 $\pm$ 1.98                   | -0.77                | 0.447   | -2.61 $\pm$ 1.94                   | -1.34                | 0.185   | 2.50 $\pm$ 9.83                    | 0.25                 | 0.801   | -0.62 $\pm$ 1.83                   | -0.34                | 0.737   |
| 3rd                                          | 4.08 $\pm$ 2.17                    | 1.88                 | 0.066   | -4.36 $\pm$ 2.13                   | -2.05                | 0.046   | 5.75 $\pm$ 10.81                   | 0.53                 | 0.597   | -1.38 $\pm$ 2.01                   | -0.68                | 0.497   |
| 4th                                          | 0.50 $\pm$ 2.67                    | 0.19                 | 0.851   | -5.25 $\pm$ 2.63                   | -2.00                | 0.051   | 7.35 $\pm$ 13.34                   | 0.55                 | 0.584   | -5.15 $\pm$ 2.49                   | -2.07                | 0.043   |
| 5th                                          | 0.12 $\pm$ 2.98                    | 0.04                 | 0.969   | -2.58 $\pm$ 2.94                   | -0.88                | 0.385   | -25.69 $\pm$ 14.93                 | -1.72                | 0.092   | -2.25 $\pm$ 2.78                   | -0.81                | 0.423   |
| Variables fitted as random effects           |                                    |                      |         |                                    |                      |         |                                    |                      |         |                                    |                      |         |
| Horse                                        | 33.12 $\pm$ 19.63                  | 1.69                 | 0.092   | 55.45 $\pm$ 30.32                  | 1.83                 | 0.067   | 2519 $\pm$ 1328                    | 1.90                 | 0.058   | 60.07 $\pm$ 32.32                  | 1.86                 | 0.063   |

<sup>a</sup> regression coefficient ( $\pm$ SE) for variables fitted as fixed effects and variance ( $\pm$ SE) for variables fitted as random effects; <sup>b</sup> reference category; ); **Abbreviations:** IL-2, interleukin 2; IL-4, interleukin 4; IL-10, interleukin 10; INF $\gamma$ , Interferon  $\gamma$ ;

**Table S2.** Cytokine transcripts whose concentration was not significantly affected by repeated training in the mixed linear model

| Variable                           | mRNA IL-1 $\beta$                  |                      |         | mRNA IL-6                          |                      |         | mRNA IL-10                         |                      |         |
|------------------------------------|------------------------------------|----------------------|---------|------------------------------------|----------------------|---------|------------------------------------|----------------------|---------|
|                                    | Estimate of the model <sup>a</sup> | Parameter statistics | p-value | Estimate of the model <sup>a</sup> | Parameter statistics | p-value | Estimate of the model <sup>a</sup> | Parameter statistics | p-value |
| Intercept                          | 0.10 $\pm$ 0.05                    | -                    | -       | -0.003 $\pm$ 0.007                 | -                    | -       | 0.002 $\pm$ 0.001                  | -                    | -       |
| Variables fitted as fixed effects  |                                    |                      |         |                                    |                      |         |                                    |                      |         |
| Time of blood collection           |                                    |                      |         |                                    |                      |         |                                    |                      |         |
| before <sup>b</sup>                | 0                                  | -                    | -       | 0                                  | -                    | -       | 0                                  | -                    | -       |
| after                              | 0.11 $\pm$ 0.04                    | 2.77                 | 0.008   | -0.005 $\pm$ 0.006                 | -0.89                | 0.380   | -0.001 $\pm$ 0.001                 | -0.65                | 0.518   |
| Training:                          |                                    |                      |         |                                    |                      |         |                                    |                      |         |
| 1st <sup>b</sup>                   | 0                                  | -                    | -       | 0                                  | -                    | -       | 0                                  | -                    | -       |
| 2nd                                | 0.06 $\pm$ 0.05                    | 1.25                 | 0.217   | -0.000 $\pm$ 0.008                 | -0.02                | 0.988   | 0.001 $\pm$ 0.002                  | 0.36                 | 0.721   |
| 3rd                                | 0.03 $\pm$ 0.06                    | 0.45                 | 0.651   | -0.000 $\pm$ 0.009                 | -0.01                | 0.989   | 0.003 $\pm$ 0.002                  | 1.48                 | 0.144   |
| 4th                                | -0.02 $\pm$ 0.07                   | -0.24                | 0.808   | -0.000 $\pm$ 0.011                 | -0.04                | 0.972   | 0.001 $\pm$ 0.002                  | 0.26                 | 0.799   |
| 5th                                | 0.08 $\pm$ 0.07                    | 1.04                 | 0.301   | 0.074 $\pm$ 0.012                  | 6.23                 | <0.001  | 0.004 $\pm$ 0.002                  | 2.00                 | 0.050   |
| Variables fitted as random effects |                                    |                      |         |                                    |                      |         |                                    |                      |         |
| Horse                              | 0.01 $\pm$ 0.01                    | 1.19                 | 0.234   | 0.000 $\pm$ 0.000                  | 0.33                 | 0.744   | 0                                  | 0                    | 0       |

<sup>a</sup> regression coefficient ( $\pm$ SE) for variables fitted as fixed effects and variance ( $\pm$ SE) for variables fitted as random effects; <sup>b</sup> reference category; ); **Abbreviations:** mRNA IL-1 $\beta$ , mRNA interleukin 1 $\beta$ ; mRNA IL-6, mRNA interleukin 6; mRNA IL-10, mRNA interleukin 10;
